# Supplementary material
Source: Royal Society of Chemistry journal article supplement (doi:10.1039/d6tc00658b)
Supplement: d6tc00658b1.pdf [file d6tc00658b1.pdf]

## Supporting Information

### **Room-temperature selective NO<sub>2</sub> sensing using porous TiO<sub>2</sub> nanorods via a humidity-mediated conduction**

*Young Geun Song<sup>1</sup>, Suk Yeop Chun<sup>2,3</sup>, Yumin Park<sup>2,3</sup>, Ilho Myeong<sup>4</sup>, Young-Seok Shim<sup>5,\*</sup>, and Chong-Yun Kang<sup>2,3,\*</sup>*

<sup>1</sup> Department of Electronic Engineering, Tech University of Korea, Siheung, 15073, Republic of Korea

<sup>2</sup> KU-KIST Graduate School of Converging Science and Technology, Korea University, Seoul, 02841, Republic of Korea

<sup>3</sup> Electronic and Hybrid Materials Research Center, Korea Institute of Science and Technology (KIST), Seoul 02791, Republic of Korea

<sup>4</sup> Department of Electronics Engineering, Myongji University, Yongin, 17058, South Korea

<sup>5</sup> School of Energy, Materials and Chemical Engineering, Korea University of Technology and Education (KOREATECH), Cheonan 31253, Republic of Korea

E-mail: ysshim@koreatech.ac.kr, cykang@kist.re.kr

Keywords: metal-oxide, gas sensor, room-temperature, humidity-mediated, TiO<sub>2</sub>, NO<sub>2</sub>

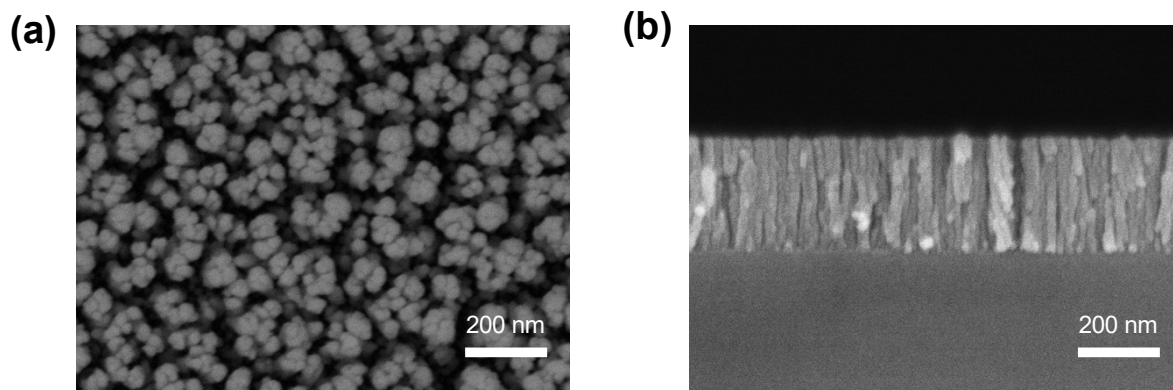

**Fig. S1** Higher magnification (a) Plane and (b) cross-sectional SEM image of TiO<sub>2</sub> NRs.

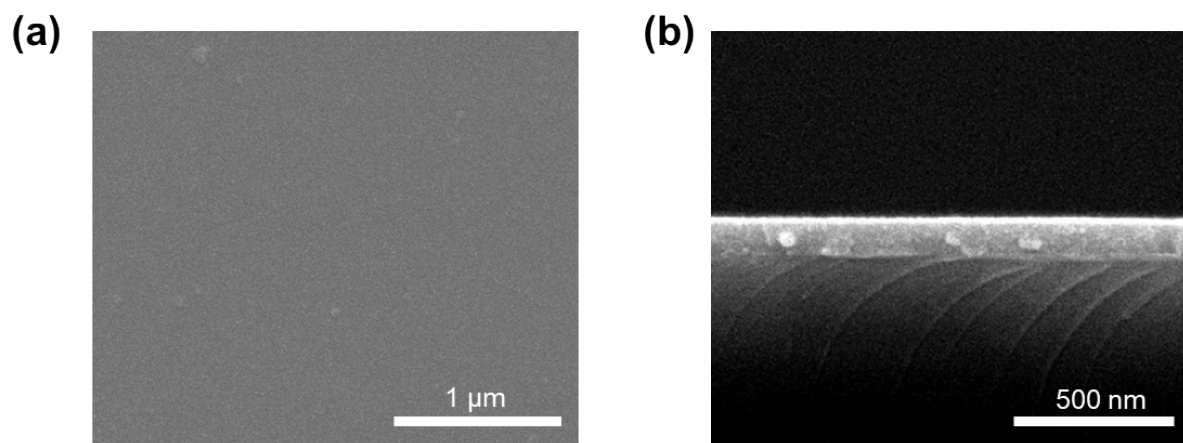

**Fig. S2** (a) Plane and (b) cross-sectional SEM images of TiO<sub>2</sub> thin films. XRD patterns of the TiO<sub>2</sub> thin films.

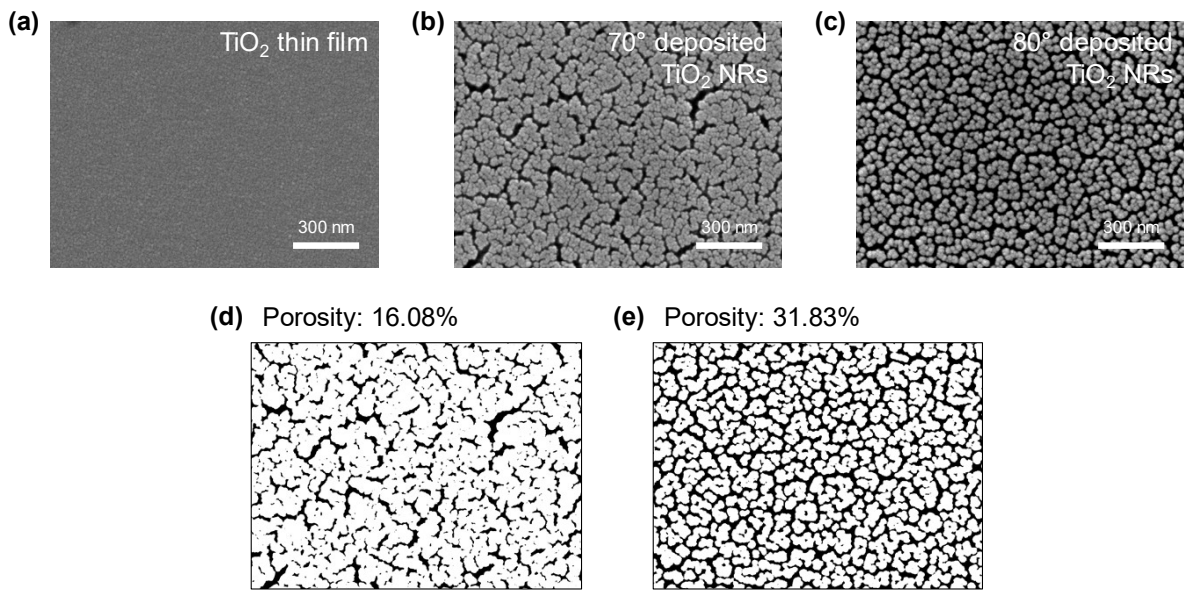

**Fig. S3** Top-view SEM images of (a) TiO<sub>2</sub> thin film, (b) NRs deposited at 70°, and (c) NRs deposited at 80°. Corresponding contrast-enhanced binary images of (d) 70° and (e) 80° samples highlighting the increased in void fraction with increasing deposition angle.

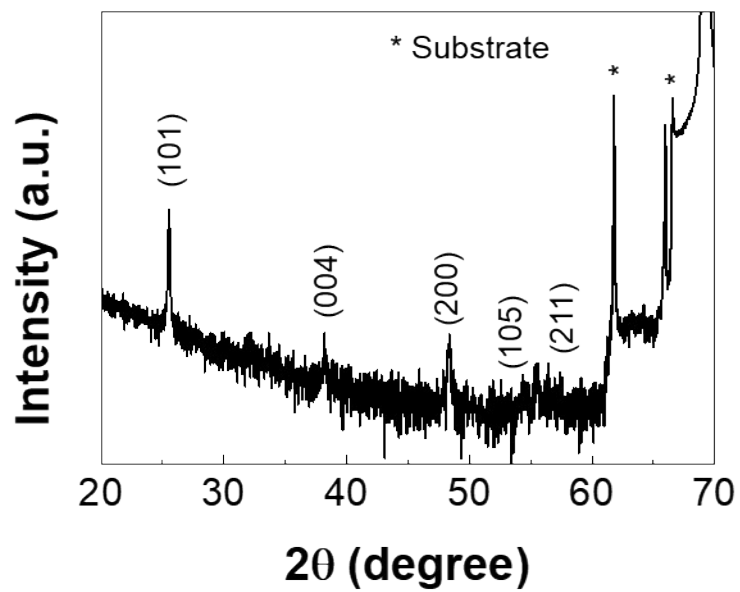

**Fig. S4** XRD pattern of TiO<sub>2</sub> NRs, showing diffraction peaks corresponding to the anatase phase (JCPDS no. 21-1272) without detectable impurity phases.

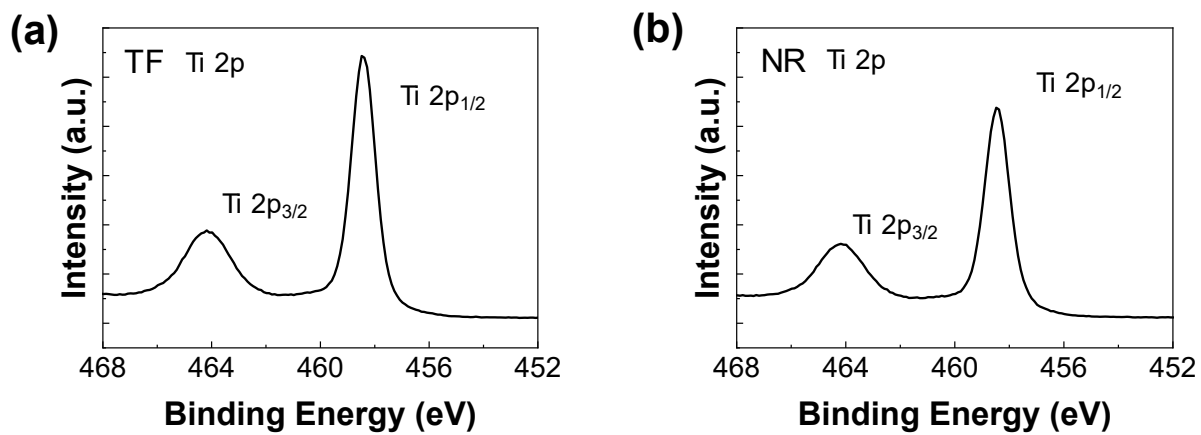

**Fig. S5** XPS spectra of Ti 2p peaks for TiO<sub>2</sub> (a) thin film and (b) NRs.

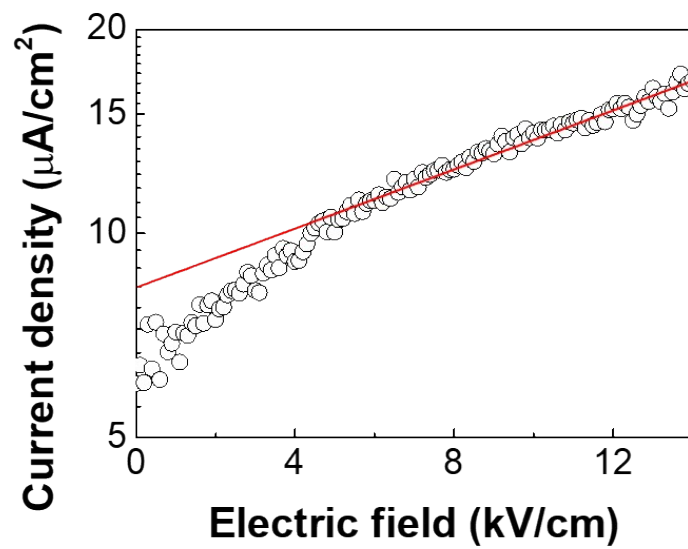

**Fig. S6** Current density–electric field (J–E) characteristics of  $\text{TiO}_2$  nanorod sensors under dry air conditions.

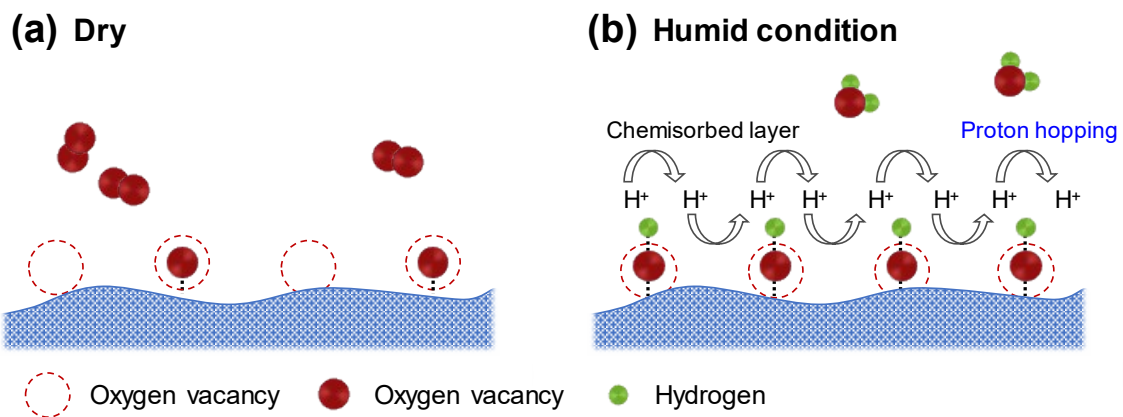

**Fig. S7** Schematic illustrations of the surface states of TiO<sub>2</sub> under (a) dry condition and (b) humid condition, where adsorbed water dissociates into hydroxyl groups, forming a chemisorbed layer that enables proton hopping through hydrogen-bonded networks

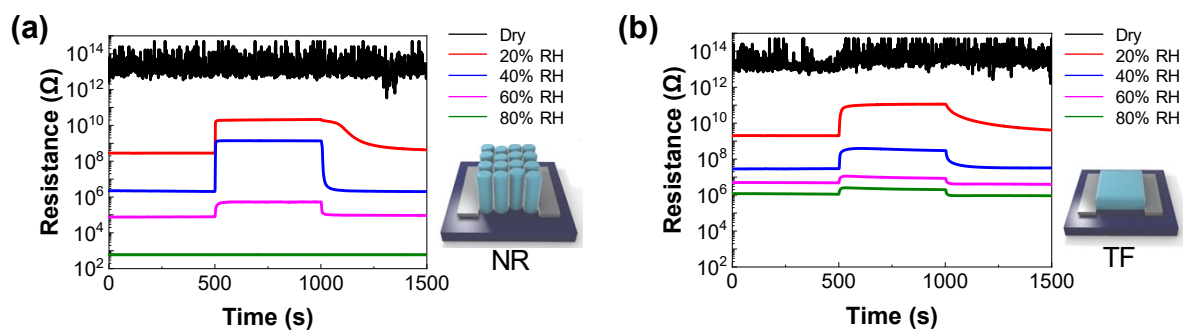

**Fig. S8** Resistance transients of (a) TiO<sub>2</sub> NRs and (b) thin films upon exposure to 2 ppm NO<sub>2</sub> at room temperature under 5 V, measured as a function of relative humidity.

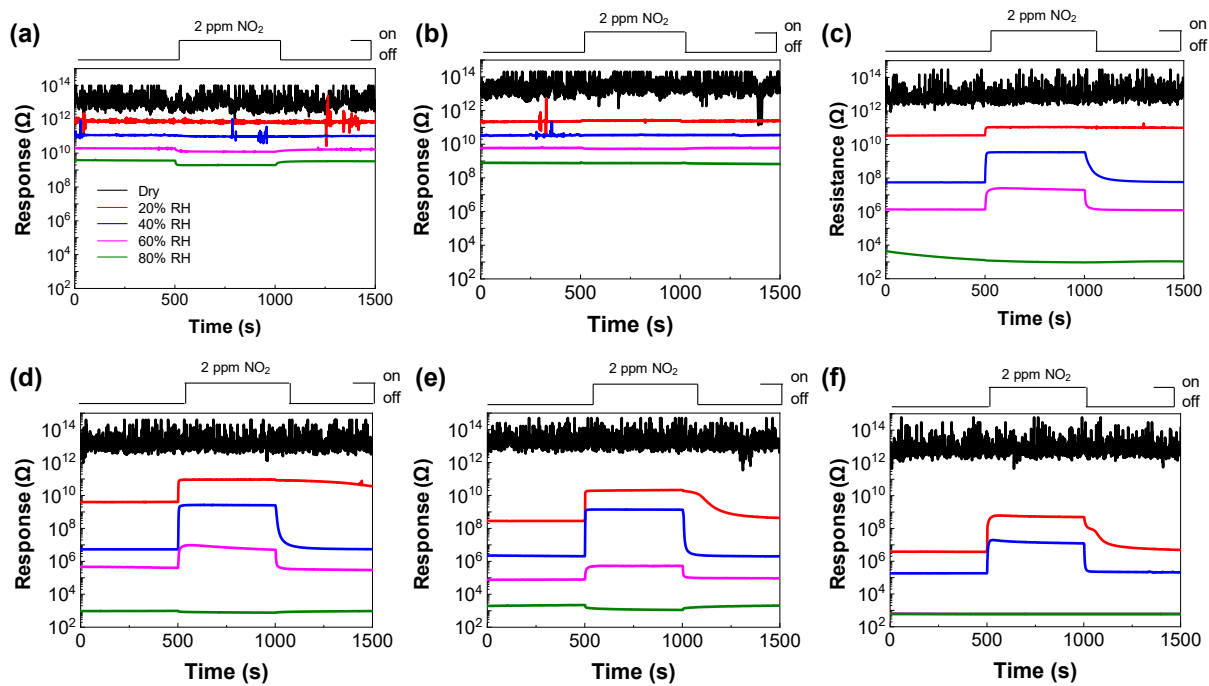

**Fig. S9** Resistance transients of TiO<sub>2</sub> NRs exposed to 2 ppm NO<sub>2</sub> under different relative humidity levels (0%, 20%, 40%, 60%, and 80%) at room temperature: (a) 1 V, (b) 2 V, (c) 3 V, (d) 4 V, (e) 5 V, and (f) 6 V applied bias conditions.

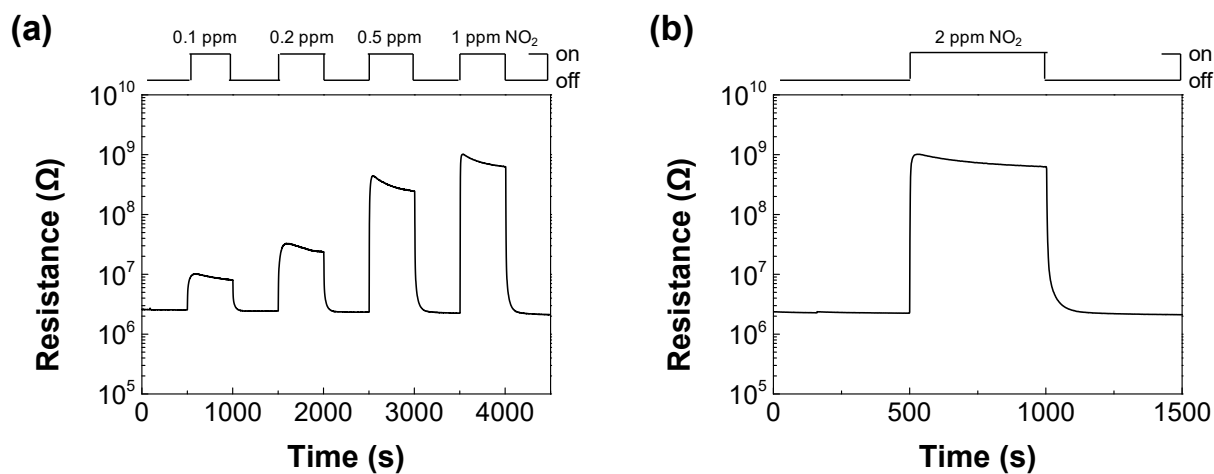

**Fig. S10** Resistance transients of TiO<sub>2</sub> NR sensors at room temperature under 5 V bias and 40% RH. (a) Responses to varying NO<sub>2</sub> concentrations of 0.1, 0.2, 0.5, and 1 ppm, and (b) response to 2 ppm NO<sub>2</sub>, demonstrating clear concentration-dependent sensing behavior.

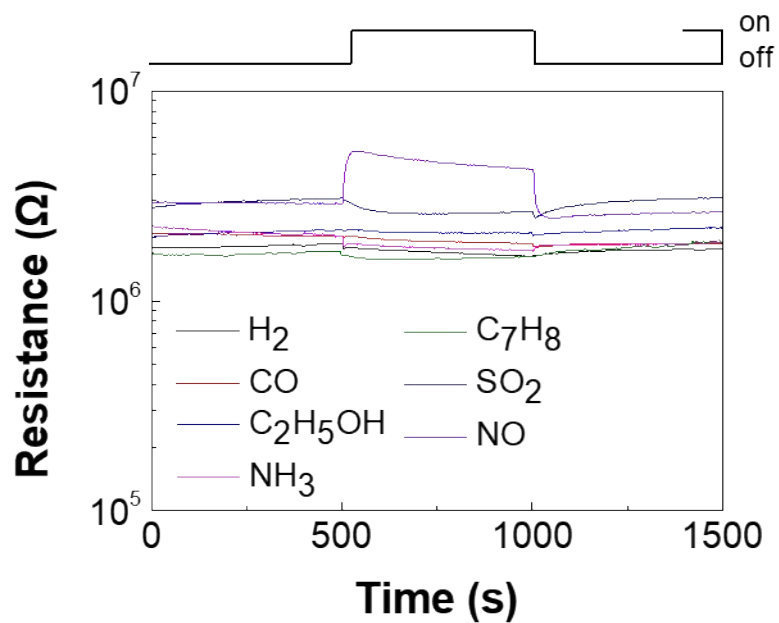

**Fig. S11** Resistance transients of  $TiO_2$  NR sensors exposed to 10 ppm of interfering gases ( $H_2$ ,  $CO$ ,  $C_2H_5OH$ ,  $NH_3$ ,  $C_7H_8$ ,  $SO_2$ , and  $NO$ ) at room temperature and 40% RH under an applied bias of 5 V, demonstrating negligible responses compared to  $NO_2$ .

**Table S1.** Sensing performance of room temperature NO<sub>2</sub> sensors

| Sensing material                          | Detection limit | NO <sub>2</sub> Response | Recovery time | RH window | Ref.      |
|-------------------------------------------|-----------------|--------------------------|---------------|-----------|-----------|
| SnO <sub>2</sub> nanorods                 | 132.3 ppt       | 3.97 @ 200 ppb           | 25.7s @ 5 ppm | 20% RH    | [1]       |
| Self-powered Au@SnO <sub>2</sub> nanorods | 4.32 ppb        | 6.39 @ 1 ppm             | 6s @ 1 ppm    | 20% RH    | [2]       |
| TiO <sub>2</sub> nanorods                 | 505 ppt         | 2.17 @ 100 ppb           | 4 s @ 2 ppm   | 20–40% RH | This work |

## References

1. Song, Y. G.; Shim, Y. S.; Suh, J. M.; Noh, M. S.; Kim, G. S.; Choi, K. S.; Jeong, B.; Kim, S.; Jang, H. W.; Ju, B. K., *Small* **2019**, *15* (40), 1902065.
2. Song, Y. G.; Jung, I.; Shin, J.; Shim, Y.-S.; Kim, G. S.; Ju, B.-K.; Kang, C.-Y., *Sensors and Actuators B: Chemical* **2021**, *332*, 129481.
